# Supplementary material for: NAD-Independent L-Lactate Dehydrogenase Is Required for L-Lactate Utilization in Pseudomonas stutzeri SDM
Source: PubMed Central journal article supplement (PMC3344892; doi:10.1371/journal.pone.0036519), 2012-05-04
Supplement: pone.0036519.s001.pdf [file pone.0036519.s001.pdf]

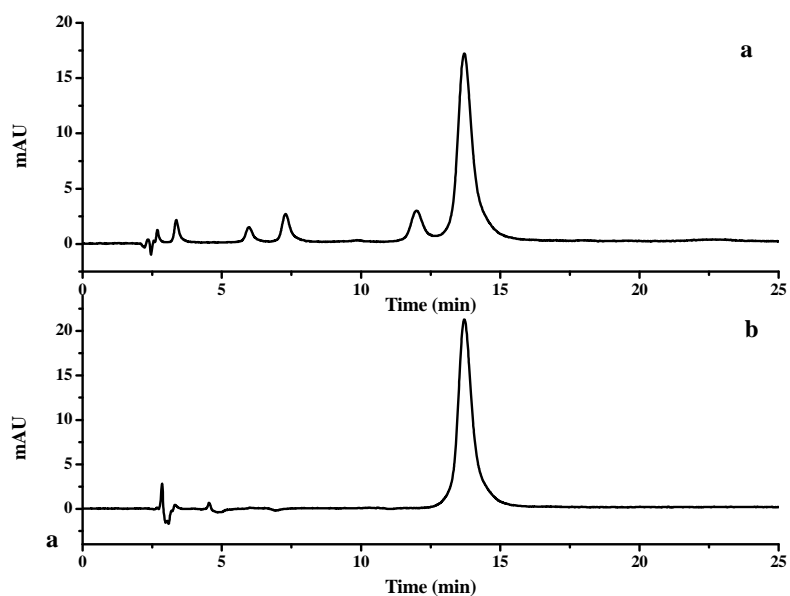

**Figure S1. HPLC analysis of (a) authentic FMN, and (b) the cofactor released from the purified L-iLDH in *P. stutzeri* SDM.** For the identification of the cofactor of L-iLDH, the purified L-iLDH was heated to 100°C for 3 min and then centrifuged at  $10,000 \times g$  for 10 min to remove denatured protein. Cofactor released from purified protein was analyzed by HPLC (Agilent 1100 series, Hewlett-Packard, USA) using an ODS C18 column ( $4.6 \times 150$  mm, particle size: 5  $\mu\text{m}$ ). The eluent was 100 mM ammonium bicarbonate 82-18% methanol. As shown in Figure S1, a compound identical to authentic FMN was produced. Therefore, L-iLDH in *P. stutzeri* SDM used FMN as the cofactor.
