# Supplementary material for: NAD-Independent L-Lactate Dehydrogenase Is Required for L-Lactate Utilization in Pseudomonas stutzeri SDM
Source: PubMed Central journal article supplement (PMC3344892; doi:10.1371/journal.pone.0036519), 2012-05-04
Supplement: pone.0036519.s003.pdf [file pone.0036519.s003.pdf]

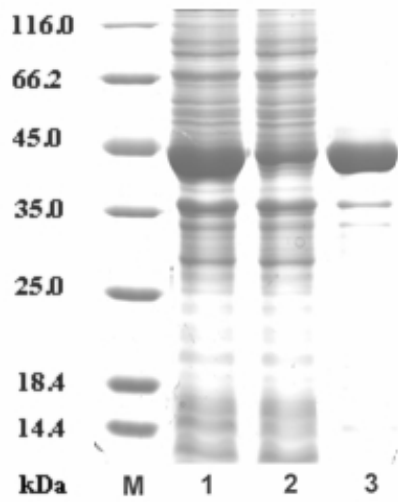

**Figure S3. SDS-PAGE analysis of over-expression and purification of L-iLDH.**

Lane M, molecular weight markers; lane 1, whole cell proteins of *E. coli* C43(DE3) (pET-LDH); lane 2, crude extract of *E. coli* C43(DE3) (pET-LDH); 3, the purified recombinant L-iLDH.
