# Supplementary material for: NAD-Independent L-Lactate Dehydrogenase Is Required for L-Lactate Utilization in Pseudomonas stutzeri SDM
Source: PubMed Central journal article supplement (PMC3344892; doi:10.1371/journal.pone.0036519), 2012-05-04
Supplement: pone.0036519.s004.pdf [file pone.0036519.s004.pdf]

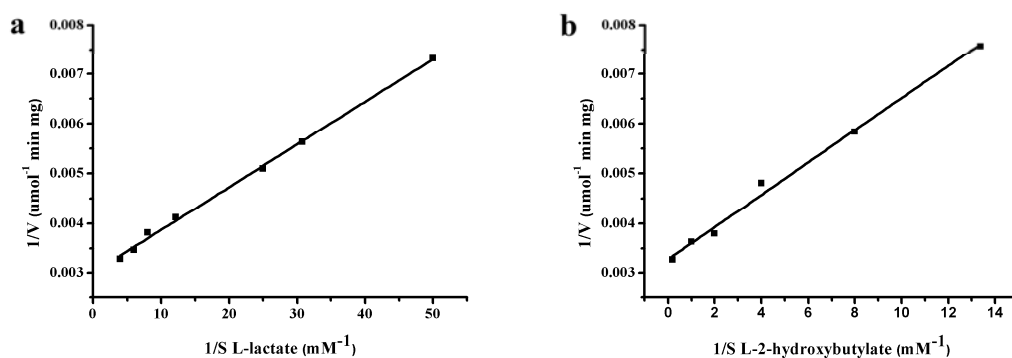

**Figure S4. Apparent  $K_m$  of L-lactate and L-2-hydroxybutylate for L-iLDH in *P. stutzeri* SDM.** The reaction mixture contained 0.2 mM MTT, 50 mM Tris-HCl (pH 7.5), and 0.1  $\mu\text{g}$  purified L-iLDH. The reaction was started with variable L-lactate and L-2-hydroxybutylate concentrations. Double-reciprocal plots of the initial rates versus the concentration of L-lactate (a) and L-2-hydroxybutylate (b) were linear and yielded the  $K_m$  values of  $29 \pm 0.65 \mu\text{M}$  and  $99 \pm 3.9 \mu\text{M}$ , respectively, at  $30^\circ\text{C}$ . The  $V_{\text{max}}$  values were estimated to be  $332.3 \pm 5.4 \mu\text{mol min}^{-1} \text{mg}^{-1}$  for L-lactate, and  $305.4 \pm 7.9 \mu\text{mol min}^{-1} \text{mg}^{-1}$  for L-2-hydroxybutylate, with MTT as the electron acceptor. The dispersion values indicate the standard errors of the mean (SEM) of the linear regression analysis of one experiment.
