# Supplementary material for: NAD-Independent L-Lactate Dehydrogenase Is Required for L-Lactate Utilization in Pseudomonas stutzeri SDM
Source: PubMed Central journal article supplement (PMC3344892; doi:10.1371/journal.pone.0036519), 2012-05-04
Supplement: pone.0036519.s007.pdf [file pone.0036519.s007.pdf]

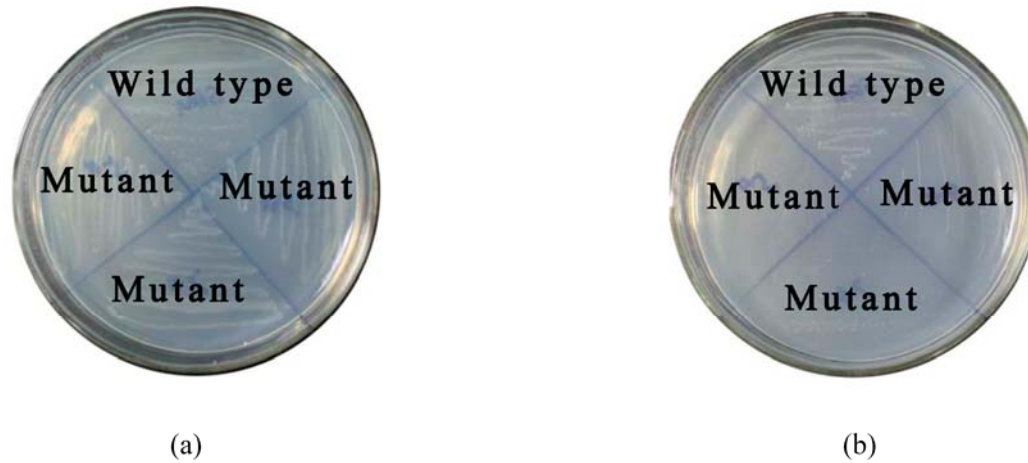

**Figure S7. The *lldD* gene is required for growth on L-lactate.** (a), growth of wild-type and mutant strains of *P. stutzeri* SDM on solid minimal media containing 0.5% pyruvate as the sole carbon source. (b), growth of the same set of strains (shown in panels a) on solid minimal media containing 0.5% L-lactate as the sole carbon source. We constructed the *P. stutzeri* SDM mutants lacking the *lldD*. Whether the mutants were impaired in growth on solid minimal medium with 0.5% L-lactate as the sole carbon source was tested. As shown in Figure S7b, the mutant exhibited little growth compared to the wild type. As a control, both the wild type and the mutant grew equally well on solid minimal medium with 0.5% pyruvate as the sole carbon source (Figure S7a).
