# Supplementary material for: NAD-Independent L-Lactate Dehydrogenase Is Required for L-Lactate Utilization in Pseudomonas stutzeri SDM
Source: PubMed Central journal article supplement (PMC3344892; doi:10.1371/journal.pone.0036519), 2012-05-04
Supplement: pone.0036519.s009.pdf [file pone.0036519.s009.pdf]

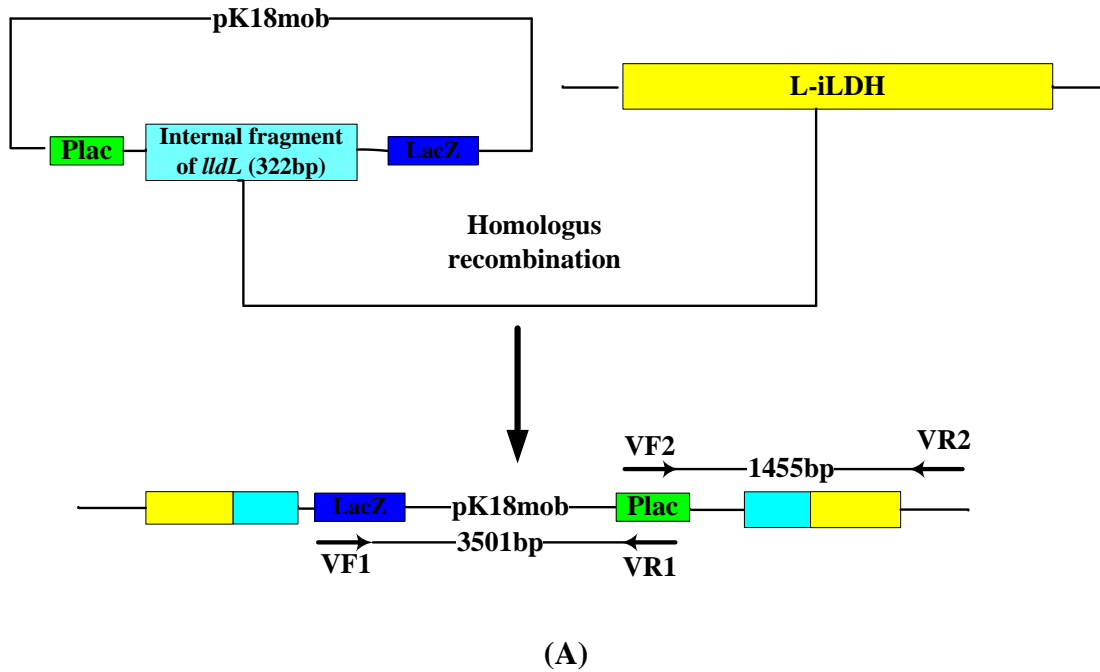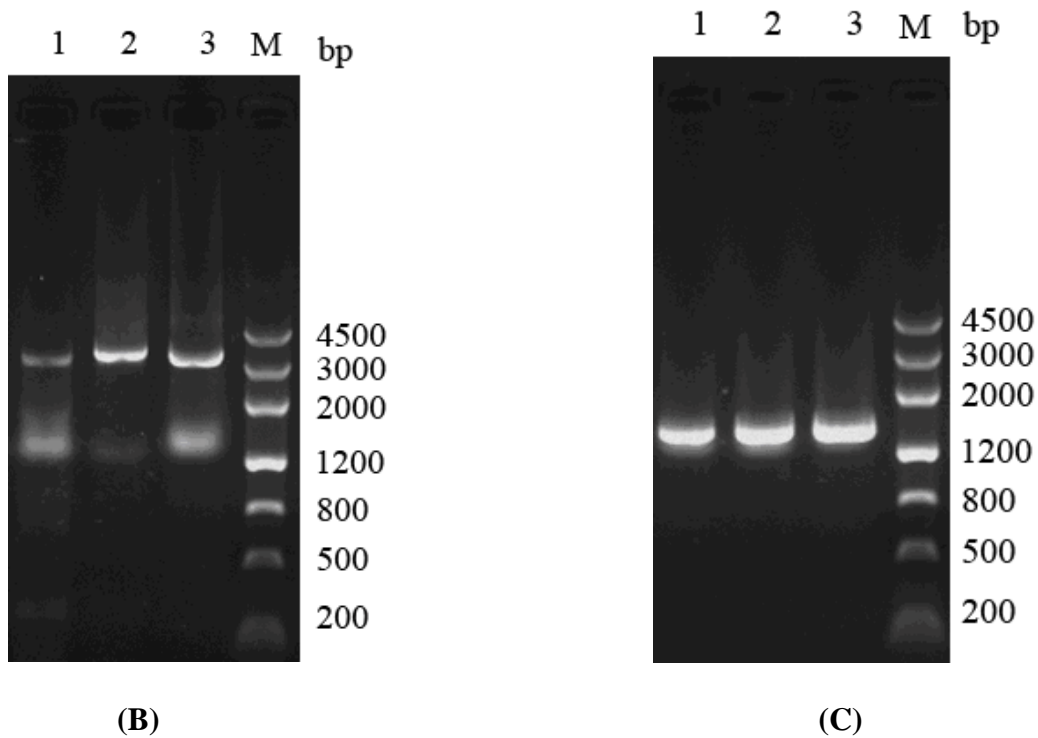

**Figure S9. PCR analysis for verification of the insertional inactivation of the gene encoding L-iLDH. the L-iLDH encoding gene *lldD*.** (A) Structure of pK18mob*lldD* (left), the L-iLDH encoding gene *lldD* in *P. stutzeri* SDM genome (right), the insertional

inactivated L-iLDH encoding gene *lldD* in *P. stutzeri* SDM genome (bottom). (B) PCR verification of the mutant strains (Figure S7) with the insertion of pK18mob in *P. stutzeri* SDM genome. In all cases, the primer pair VF1/VR1 (arrows; for the sequence, see Table S1) was used. (C) PCR verification of the mutant strains (Figure S7) with the homologous recombination between pK18moblldD and *P. stutzeri* SDM genome. In all cases, the primer pair VF2/VR2 (arrows; for the sequence, see Table S1) was used.
